# Supplementary material
Source: PubMed Central journal article supplement (PMC5741433)
Supplement: supp_5.4.E808_2017-0065-1-at.pdf [file supp_5.4.E808_2017-0065-1-at.pdf]

**Appendix 1 (as supplied by the authors): Standardized data extraction tool and characteristics of publicly funded medication plans for those on social assistance/low income, seniors and the general population under Age 65**

**A Synthesis of Canadian Drug Plans' Objectives, Characteristics and Tools used for Reimbursement**

---

**Name of Province:**

---

The provincial website lists the following publicly funded prescription drug plans in your province:

---

Have we captured all of the publicly funded prescription drug plans in your province? If no, please list those missing.

---

We wish to synthesize information on the publicly funded prescription drug plans for three major beneficiary groups in your province. Please verify if the appropriate plan has been listed for the corresponding beneficiary group:

| Beneficiary Group                        | Name of Prescription Drug Plan |
|------------------------------------------|--------------------------------|
| Individuals in Need of Social Assistance |                                |
| Individuals Over the Age of 65           |                                |
| General Population                       |                                |

If no, please list the correct corresponding drug plans.

|                                          |  |
|------------------------------------------|--|
| Individuals in Need of Social Assistance |  |
| Individuals Over the Age of 65           |  |
| General Population                       |  |

In the following tables, we obtained data for each of the publicly funded prescription drug plans for these three major beneficiary groups from the provincial website and other online and public sources.

**CONTACT INFORMATION:**

|                                                                                                                                                            |                                                                                                                                                                                    |
|------------------------------------------------------------------------------------------------------------------------------------------------------------|------------------------------------------------------------------------------------------------------------------------------------------------------------------------------------|
| Dr. Braden Manns<br>Professor<br>University of Calgary<br><a href="mailto:Braden.manns@albertahealthservices.ca">Braden.manns@albertahealthservices.ca</a> | Dr. Fiona Clement<br>Assistant Professor<br>Director, Health Technology Assessment Unit<br>University of Calgary<br><a href="mailto:fclement@ucalgary.ca">fclement@ucalgary.ca</a> |
|------------------------------------------------------------------------------------------------------------------------------------------------------------|------------------------------------------------------------------------------------------------------------------------------------------------------------------------------------|

## Data collected for *publicly funded* prescription drug plans across Canada

|                                                                                                                                                            | Social Assistance | Over the age of 65 | General population |
|------------------------------------------------------------------------------------------------------------------------------------------------------------|-------------------|--------------------|--------------------|
| Name of prescription drug plan                                                                                                                             |                   |                    |                    |
| Who qualifies for this plan?                                                                                                                               | -                 | -                  |                    |
| What is the mandate, objective or mission of this plan?                                                                                                    |                   |                    |                    |
| If a mandate, objective or mission is not available, please provide a description of this plan.                                                            |                   |                    |                    |
| Is there a premium <sup>1</sup> for this plan? If so, is it monthly or yearly? How much? Does the premium vary on any factors, such as age or income?      |                   |                    |                    |
| Is a deductible <sup>2</sup> used for this plan? If so, is it monthly or yearly? How much? Does the deductible vary on any factors, such as age or income? |                   |                    |                    |
| Is a cap <sup>3</sup> used for this plan? If so, is it monthly or yearly? How                                                                              |                   |                    |                    |

<sup>1</sup>*Premium*: a fixed amount, not related to the number of prescriptions, that a beneficiary must pay to be eligible for prescription drug insurance.

<sup>2</sup>*Deductible*: a limit up to which a patient pays the full cost of the drug. After the deductible is reached, the patient either does not pay or has reduced payments for prescriptions.

<sup>3</sup>*Cap*: a limit below which a patient does not pay or has reduced payments for prescriptions. After the cap is reached, full payment is required by the patient.

---

---

**Social Assistance****Over the age of 65****General population**

---

---

**much? Does the cap vary on any factors, such as age or income?**

**Is there a maximum out of pocket limit<sup>4</sup> (either monthly or annual) for drug expenditures? If so, please specify amount and time period.**

**Are copayments<sup>5</sup> used for this plan?**

**What is the copayment for this plan? Specify details.**

**Who are the first and second payers in your province?**

**Does cost-sharing vary on condition, income or other socio-economic factors? If so, detail plan variants.**

**Is there a maximum copayment made by the patient per drug dispensed?**

---

<sup>4</sup>*Maximum out-of-pocket limit*: A limit that is set as a fixed dollar amount or as a percentage of income after which the insurer pays 100% of the drugs. Copayments are in place prior to the limit being reached.

<sup>5</sup>*Copayment*: an amount per drug or per prescription that a patient pays.

---

---

**Social Assistance****Over the age of 65****General population**

---

---

**Is there mandatory generic drug substitution<sup>6</sup> in your province?  
Is there a least cost alternative<sup>7</sup> program in place for generic medications in your province?**

**How are generics priced in your province?**

**Does the same copayment policy apply to brand name and generic drugs?**

**Is reference pricing<sup>8</sup> used to determine the prices of drugs?  
If so, specify details.**

**Please list any future initiatives or changes to this plan.**

---

---

<sup>6</sup>*Mandatory generic substitution*: where, regardless of what is written for the prescription, a pharmacist substitutes a generic, if available.

<sup>7</sup>*Least cost alternative price*: is the lowest unit cost established for a drug within a set of interchangeable drug products with the same active ingredient or combination of active ingredients and the same strength.

<sup>8</sup>*Reference pricing*: For drugs with different active ingredients that are therapeutically equivalent and used to treat the same conditions (here called a reference drug group), one reference drug (or a group of reference drugs) is chosen. The price of the reference drug is reimbursed (except for ordinary copayment). For drugs that are more expensive than the reference drug, the patient has to pay the expenses above the reference price.

**Supplementary Table 1. Characteristics of Publicly Funded Medication Plans for those on Social Assistance/Low Income**

|                         | <b>Name of Plan</b>                                                                           | <b>Premium</b> | <b>Fixed Copayment</b>                          | <b>Co-Insurance</b> | <b>Deductible</b> | <b>Maximum Out-of-Pocket</b> |
|-------------------------|-----------------------------------------------------------------------------------------------|----------------|-------------------------------------------------|---------------------|-------------------|------------------------------|
| <b>Alberta</b>          | Alberta Adult Health Benefit (AAHB)                                                           | ✘              | ✘                                               | ✘                   | ✘                 | N/A                          |
| <b>British Columbia</b> | PharmaCare Plan C                                                                             | ✘              | ✘                                               | ✘                   | ✘                 | N/A                          |
| <b>Saskatchewan</b>     | Supplementary Health Program – Prescription Medications                                       | ✘              | Up to \$2 per prescription dispensed for adults | ✘                   | ✘                 | ✘                            |
| <b>Manitoba</b>         | Employment and Income Assistance (EIA) – Prescription Medications Assistance for Participants | ✘              | ✘                                               | ✘                   | ✘                 | N/A                          |
| <b>Ontario</b>          | Ontario Medication Benefit (ODB) Program                                                      | ✘              | \$2 per prescription dispensed                  | ✘                   | ✘                 | ✘                            |
| <b>Quebec</b>           | Public Prescription Medication Insurance Plan                                                 | ✘              | ✘                                               | ✘                   | ✘                 | ✘                            |
| <b>Newfoundland and</b> | Foundation Plan (income                                                                       | ✘              | ✘                                               | ✘                   | ✘                 | N/A                          |

|                             | <b>Name of Plan</b>                                                                        | <b>Premium</b> | <b>Fixed Copayment</b>                                                                 | <b>Co-Insurance</b>                                       | <b>Deductible</b> | <b>Maximum Out-of-Pocket</b>   |
|-----------------------------|--------------------------------------------------------------------------------------------|----------------|----------------------------------------------------------------------------------------|-----------------------------------------------------------|-------------------|--------------------------------|
| <b>Labrador</b>             | support recipients)                                                                        |                |                                                                                        |                                                           |                   |                                |
|                             | Access Plan<br>(low income families and individuals)                                       | ✘              | ✘                                                                                      | 20% - 70% of total prescription costs, varies with income | ✘                 | ✘                              |
| <b>Nova Scotia</b>          | Pharmacare Benefit                                                                         | ✘              | \$5 per prescription dispensed                                                         | ✘                                                         | ✘                 | ✘                              |
| <b>New Brunswick</b>        | Plan E (Adults in Licensed Residential Facilities)                                         | ?              | \$4 per prescription dispensed                                                         | ✘                                                         | ?                 | \$250 annually                 |
|                             | Plan F (Social Development Clients)                                                        | ?              | \$4 per prescription dispensed for adults (> 18 yrs.) and \$2 for children (< 18 yrs.) | ✘                                                         | ?                 | \$250 per family unit annually |
|                             | Plan G (Special needs children and children in care of the Minister of Social Development) | ✘              | ✘                                                                                      | ✘                                                         | ✘                 | N/A                            |
| <b>Prince Edward Island</b> | Financial Assistance Medication Program                                                    | ✘              | ✘                                                                                      | ✘                                                         | ✘                 | N/A                            |

✘ = no; N/A = not applicable; -- = not covered; ? = unclear

**Supplementary Table 2. Characteristics of Publicly Funded Medication Plans for Seniors**

|                                               | <b>Name of Plan</b>                           | <b>Premium</b> | <b>Fixed Copayment</b>                                       | <b>Co-Insurance</b>                                             | <b>Deductible</b>                                                                                        | <b>Maximum Out-of-Pocket</b>                       |
|-----------------------------------------------|-----------------------------------------------|----------------|--------------------------------------------------------------|-----------------------------------------------------------------|----------------------------------------------------------------------------------------------------------|----------------------------------------------------|
| <b>Alberta</b><br>(Over age of 65)            | Coverage for Seniors                          | ✘              | ✘                                                            | 30% of the cost of the prescription dispensed.                  | ✘                                                                                                        | \$25 maximum per prescription dispensed            |
| <b>British Columbia</b><br>(Born before 1939) | Fair Pharmacare                               | ✘              | ✘                                                            | After deductible, 25% of the cost of the prescription dispensed | Annually 0-2% of net income, varies with income                                                          | Annually 1.25-3% of net income, varies with income |
| <b>Saskatchewan</b><br>(Over age of 65)       | Seniors' Medication Plan                      | ✘              | Maximum \$20 per prescription medication dispensed           | ✘                                                               | ✘<br><br>(Unless GIS recipient, Seniors Income Plan [SIP], or supplemented with Special Support Program) | N/A                                                |
| <b>Manitoba</b>                               | Same as general population. No age-based plan |                |                                                              |                                                                 |                                                                                                          |                                                    |
| <b>Ontario</b><br>(Over age of 65)            | Ontario Medication Benefit (ODB) Program      | ✘              | \$2 per prescription dispensed if income <\$16,018 (single), | ✘                                                               | \$0 if income <\$16,018 (single), <\$24,175 (couple)                                                     | N/A                                                |

|                                                                                                                                   | Name of Plan                                  | Premium                                  | Fixed Copayment                                                               | Co-Insurance                                                    | Deductible      | Maximum Out-of-Pocket                                             |
|-----------------------------------------------------------------------------------------------------------------------------------|-----------------------------------------------|------------------------------------------|-------------------------------------------------------------------------------|-----------------------------------------------------------------|-----------------|-------------------------------------------------------------------|
|                                                                                                                                   |                                               |                                          | <\$24,175 (couple)<br><br>Maximum \$6.11 per prescription dispensed otherwise |                                                                 | \$100 otherwise |                                                                   |
| <b>Quebec</b><br><br>(Over age of 65, not eligible for private insurance)                                                         | Public Prescription Medication Insurance Plan | Annually \$0 - \$607, varies with income | ✘                                                                             | After deductible, 34% of the cost of the prescription dispensed | \$18 monthly    | Monthly: \$85.75<br><br>Annual: \$1029                            |
| <b>Newfoundland and Labrador</b><br><br>(Over age of 65 and receiving Old Age Security Benefits and Guaranteed Income Supplement) | 65Plus Plan                                   | ✘                                        | Maximum \$6 of dispensing fee per prescription                                | ✘                                                               | ✘               | ✘                                                                 |
| <b>Nova Scotia</b><br><br>(Over age of 65)                                                                                        | Senior's Pharmacare                           | Annually \$0-\$424, varies with income   | ✘                                                                             | 30% of the cost of the prescription dispensed                   | ✘               | Annual limit including premium and copayments \$382-\$806, varies |



|                                                 | <b>Name of Plan</b>                                                                                            | <b>Premium</b> | <b>Fixed Copayment</b>                                                                                        | <b>Co-Insurance</b> | <b>Deductible</b> | <b>Maximum Out-of-Pocket</b>                                 |
|-------------------------------------------------|----------------------------------------------------------------------------------------------------------------|----------------|---------------------------------------------------------------------------------------------------------------|---------------------|-------------------|--------------------------------------------------------------|
|                                                 |                                                                                                                |                |                                                                                                               |                     |                   | with income                                                  |
| <b>New Brunswick</b>                            | New Brunswick Seniors Plan A (Over 65 yrs. and receiving Guaranteed Income Supplement (GIS) or are low income) | ✘              | GIS recipients:<br>Maximum \$9.05 per prescription dispensed<br><br>\$15 per prescription dispensed otherwise | ✘                   | ✘                 | Annual for GIS recipients: \$500<br><br>No maximum otherwise |
|                                                 | Medavie Blue Cross Seniors Prescription Medication Program (over 65 yrs. of age)                               | \$115 monthly  | Up to \$15 per prescription dispensed                                                                         | ✘                   | ✘                 | ✘                                                            |
| <b>Prince Edward Island</b><br>(Over age of 65) | Seniors' Medication Cost Assistance Program                                                                    | ✘              | Maximum \$8.25 per prescription dispensed plus pharmacy professional fee up to \$7.69                         | ✘                   | ✘                 | ✘                                                            |

✘ = no; N/A = not applicable; -- = not covered; ? = unclear

**Supplementary Table 3. Characteristics of Publicly Funded Medication Plans for the General Population Under Age 65**

|                                                       | <b>Name of Plan</b>     | <b>Premium</b>                                                                     | <b>Fixed Copayment</b> | <b>Co-Insurance</b>                                                                                                              | <b>Deductible</b>                                                            | <b>Maximum Out-of-Pocket</b>                           |
|-------------------------------------------------------|-------------------------|------------------------------------------------------------------------------------|------------------------|----------------------------------------------------------------------------------------------------------------------------------|------------------------------------------------------------------------------|--------------------------------------------------------|
| <b>Alberta</b><br>(AB resident, under 65 yrs. of age) | Non-Group Coverage      | Monthly premium<br><br>Single = \$63.50<br>Family = \$ 118<br><br>Billed quarterly | ✘                      | 30% of the cost of the prescription dispensed                                                                                    | ✘<br><br>(deductible applies to other health benefits, excludes medications) | \$25 maximum per prescription dispensed                |
| <b>British Columbia</b><br>(BC resident)              | Fair Pharmacare         | ✘                                                                                  | ✘                      | After deductible, 30% of the cost of the prescription dispensed                                                                  | Annually 0-3% of net family income, varies with income                       | Annually 2-4% of net family income, varies with income |
| <b>Saskatchewan</b><br>(Sask. resident)               | Special Support Program | ✘                                                                                  | ✘                      | Before deductible, varies with income and monthly medication expenditures<br><br>After deductible, 35% of prescription dispensed | 3.4% of net family income<br><br>Paid semi-annually                          | ✘                                                      |

|                                                                                       | <b>Name of Plan</b>                           | <b>Premium</b>                                 | <b>Fixed Copayment</b>                                   | <b>Co-Insurance</b>                                                   | <b>Deductible</b>                                                     | <b>Maximum Out-of-Pocket</b>                     |
|---------------------------------------------------------------------------------------|-----------------------------------------------|------------------------------------------------|----------------------------------------------------------|-----------------------------------------------------------------------|-----------------------------------------------------------------------|--------------------------------------------------|
| <b>Manitoba</b><br>(MB resident)                                                      | Pharmacare Program                            | ✘                                              | ✘                                                        | ✘                                                                     | Annually 2.97-6.73% of net income, varies by income, minimum of \$100 | N/A                                              |
| <b>Ontario</b><br>(ON resident, no or limited private insurance)                      | Trillium Medication Program                   | ✘                                              | After deductible, maximum \$2 per prescription dispensed | ✘                                                                     | Annually ~4% of net income<br><br>Paid quarterly.                     | ✘                                                |
| <b>Quebec</b><br>(those not eligible for private insurance)                           | Public Prescription Medication Insurance Plan | Annual premium \$0 - \$660, varies with income | ✘                                                        | After deductible, 34% of the cost of the prescription dispensed       | \$18 monthly                                                          | Monthly: \$85.75<br>Annual: \$1029               |
| <b>Newfoundland and Labrador</b><br>(NFLD resident, experience high medication costs) | Assurance Plan                                | ✘                                              | ✘                                                        | Rate= (family income*cap rate)/total medication expenditure of family | ✘                                                                     | Annually 5-10% of net income, varies with income |
| <b>Nova Scotia</b><br>(NS resident)                                                   | Family Pharmacare                             | ✘                                              | ✘                                                        | 20% of the cost of the prescription dispensed                         | Annually 1-20% of net income, varies by                               | Annually 6-35% of net income, varies by income   |

|                                                                        | <b>Name of Plan</b>                                                                                                                                                | <b>Premium</b>                                   | <b>Fixed Copayment</b> | <b>Co-Insurance</b>                                                                     | <b>Deductible</b> | <b>Maximum Out-of-Pocket</b> |
|------------------------------------------------------------------------|--------------------------------------------------------------------------------------------------------------------------------------------------------------------|--------------------------------------------------|------------------------|-----------------------------------------------------------------------------------------|-------------------|------------------------------|
|                                                                        |                                                                                                                                                                    |                                                  |                        |                                                                                         | income            |                              |
| <b>New Brunswick</b><br>(NB resident, no or limited private insurance) | New Brunswick Medication Plan                                                                                                                                      | Annual premium \$200-\$2,000, varies with income | ✘                      | 30% of the cost to a maximum of \$5-\$30 per prescription dispensed, varies with income | ✘                 | ✘                            |
| <b>Prince Edward Island</b><br>(PEI residents, no private insurance)   | Generic Medication Program, 8 disease-based medication plans, 4 medication-specific plans and 2 high-cost medication plans. Limited details of coverage available. |                                                  |                        |                                                                                         |                   |                              |

✘ = no; N/A = not applicable; -- = not covered; ? = unclear
