# Supplementary material
Source: PubMed Central journal article supplement (PMC5741433)
Supplement: supp_5.4.E808_2017-0065_Original_submission.pdf [file supp_5.4.E808_2017-0065_Original_submission.pdf]

1  
2  
3 **Differences in Canadian public medication insurance plans and the impact on out-of-pocket**  
4  
5 **costs**  
6  
7  
8  
9  
10

11  
12 David J.T. Campbell, MD, MSc, PhD <sup>1</sup>  
13

14  
15 Braden J. Manns, MD, MSc, FRCPC <sup>1,2,3</sup>  
16  
17

18  
19 Lesley J.J. Soril, MSc <sup>2</sup>  
20  
21

22  
23 Fiona Clement, PhD <sup>2,3</sup>  
24  
25  
26  
27  
28

29  
30 1 – Department of Medicine, Cumming School of Medicine, University of Calgary  
31

32  
33 2 – Department of Community Health Sciences, Cumming School of Medicine, University of  
34  
35 Calgary  
36  
37

38  
39 3- O'Brien Institute for Public Health, Cumming School of Medicine, University of Calgary  
40  
41  
42  
43  
44  
45  
46  
47  
48  
49  
50  
51  
52  
53  
54  
55  
56  
57  
58  
59  
60

**ABSTRACT (250 words)**

**Background:** Research from 2006 documented significant variation in medication coverage for residents across Canada. Since then, provinces have undertaken major medication plan reforms. We sought to describe the differences across Canada and the resultant difference in out-of-pocket costs.

**Methods:** A synthesis was completed using data from public medication plan websites and other public source documents. Using two hypothetical clinical case scenarios, we determined the amount and type of a patient's out-of-pocket costs for five different patient subtypes: social assistance beneficiary, high income senior, low income senior, high income non-senior and low income non-senior.

**Results:** There is a public medication plan available for all Canadians. Cost sharing is employed across all provinces. Some residents must pay a premium to receive insurance or pay 100% of their medications costs until reaching a deductible amount, above which government funding covers a portion of medication costs. The out of pocket costs for the low medication burden scenario (~ \$500 medication cost) ranged from \$0-\$2100 while the costs for the high burden scenario (~\$1800 in medication cost) ranged from \$0-\$2500 with the variation due to province of residence, age and income.

**Interpretation:** Despite the lack of a national pharmacare program, there is a medication insurance plan, offering some level of government support, available for all Canadians. However, there continues to exist variations across the provinces with some groups facing large out of pocket expenses. Future work should focus on lack of affordability due to the cost-sharing structures rather than the ability to obtain medication insurance.

1  
2  
3 **Background:**  
4

5  
6 Although the Canada Health Act ensures universal coverage of medically necessary physician  
7  
8 and hospital care, outpatient medications are not included in the Canada Health act and there is  
9  
10 no requirement for provinces to provide outpatient medication coverage for all residents. As  
11  
12 such, many studies have noted that Canada lacks universal medication insurance (1). Recent  
13  
14 studies show that 14% of Western Canadians with chronic diseases do not have medication  
15  
16 insurance (2). Even those Canadians that have medication insurance (public or private) generally  
17  
18 pay a portion of the costs of their prescription medications. An estimated 10% of Canadians who  
19  
20 are prescribed medications experience financial difficulties leading to cost-related non-  
21  
22 adherence (i.e. not taking medications when indicated, not filling medications when needed and  
23  
24 stretching prescriptions to last longer) (3). In addition, 8-22% of Western Canadians with chronic  
25  
26 diseases perceive a financial barrier to care (2, 4). Individuals who perceive a financial barrier  
27  
28 were found to be half as likely to receive preventive medications (1), and had higher  
29  
30 hospitalization and mortality rates, compared to those who didn't perceive financial barriers (4).  
31  
32  
33  
34  
35  
36  
37  
38  
39  
40

41 Each individual province and territory has developed their own publicly funded medication  
42  
43 plans to cover different segments of their populations – often described as a 'patchwork' (5). In  
44  
45 addition, a variety of cost-sharing and cost-containment mechanisms are employed across  
46  
47 Canada including co-insurance, co-payments, deductibles and generic substitution rules  
48  
49 (definitions in Box 1). Recent Canadian work has demonstrated that the risk of cost-related  
50  
51 nonadherence increases significantly when out-of-pocket payments exceed a threshold of  
52  
53 approximately 5% of household income (6).  
54  
55  
56  
57  
58  
59  
60

1  
2  
3  
4  
5  
6 In 2006, interprovincial differences in public medication plans were documented, and the  
7  
8 implications for patients were examined through a series of hypothetical case scenarios  
9  
10 illustrating the amount of out-of-pocket expenditures by province (7). Since 2006, several  
11  
12 provinces have undertaken major redesigns to their public medication plans, including the  
13  
14 populations eligible, the cost-sharing between the government and patients, generic medication  
15  
16 use and the use of premiums. Thus, we sought to update the information on publicly funded  
17  
18 medication insurance plans available across Canada, and compare out-of-pocket costs for  
19  
20 Canadians from across the country, based on medication burden, age and income. We provide  
21  
22 illustrative examples to aid in understanding the current financial burden of typical patients and  
23  
24 identify the types of patients most likely to experience high out-of-pocket costs.  
25  
26  
27  
28  
29  
30  
31  
32

### 33 **Methods:**

34  
35  
36 A synthesis of all provincial publicly funded medication plans was completed. Data were  
37  
38 extracted from public medication plan websites and other public source documents. Key data  
39  
40 elements included the relevant policies and rules of insurance plans (including generic  
41  
42 substitution and first payer policies), populations covered by the publicly funded plans, the cost  
43  
44 sharing mechanisms and the cost-containment strategies used by each plan. All data are current  
45  
46 to November 2016, and the accuracy of the data abstracted was confirmed with provincial  
47  
48 experts. The Territories and federal plans were not included in this analysis as these jurisdictions  
49  
50 have limited information available publicly.  
51  
52  
53  
54  
55  
56  
57  
58  
59  
60

1  
2  
3 To assess the variation in out-of-pocket costs across the country, we developed two clinical  
4 scenarios that would be commonly seen by Canadian physicians. We assumed that patients  
5 would all hold the public medication insurance that was available to them based on their age  
6 and income. For each of the clinical scenarios (Box 1), we simulated five different age and  
7 income scenarios to illustrate variations in the provincial medication plan coverage. Specifically,  
8 we considered how a patient's age (under or over age 65), household income (above or below  
9 low income cut-offs), and social assistance beneficiary status impacted out of pocket cost (Box  
10 1).  
11  
12  
13  
14  
15  
16  
17  
18  
19  
20  
21  
22  
23  
24  
25

26 For each clinical scenario and patient demographic profile, we calculated the annual patient-  
27 borne out-of-pocket costs based on the eligibility rules and regulations of the applicable  
28 provincial insurance plan. Each component of the total cost was reported separately (i.e.  
29 deductible, copayment and premium). We assumed that all prescriptions were dispensed in 3-  
30 month supplies as the majority of provinces allow a maximum of 100 days per dispense. To  
31 ensure that the differences in out-of-pocket costs were due to the different cost-sharing  
32 mechanisms employed in each plan, and not due to different absolute medication prices  
33 negotiated by provinces with pharmaceutical companies, we used the 2016 Alberta medication  
34 prices for all provinces and territories (8). The province-specific dispensing fee was added to the  
35 total cost of each prescription. All costs are expressed in 2016 Canadian dollars.  
36  
37  
38  
39  
40  
41  
42  
43  
44  
45  
46  
47  
48  
49  
50

### 51 **Results:**

52  
53  
54 *Comparison of medication plans across Canada:*  
55  
56  
57  
58  
59  
60

1  
2  
3 All provinces have generic payment rules which generally state that the provincial payer will  
4  
5 only pay the amount for generic equivalents, where available. With the exception of QC, all  
6  
7 provinces use multiple medication insurance plans, ranging from 5 plans (MB, NL, NS) to 27  
8  
9 distinct plans (PEI) (Table 1). All provinces have generous plans for social assistance beneficiaries  
10  
11 that leave patients with minimal, or no, out-of-pocket expenditures. All of the provinces have  
12  
13 different plans for those under and over 65 years of age except Manitoba and British Columbia  
14  
15 (who is in the process of phasing out their age-based plan). Some provinces rely on premium-  
16  
17 based systems, while most use primarily some mix of copayments and deductibles to cost-share  
18  
19 with beneficiaries. In general, the amount of out-of-pocket expenditures paid by Canadians  
20  
21 varies by medication burden and/or income level, except within Alberta, where all individuals  
22  
23 under 65 years of age with an individual income more than of \$20,970 (or family income of  
24  
25 \$33,240), have the same out-of-pocket burden (Appendix 1). Other characteristics of the plans  
26  
27 that vary across Canada include the adoption of first-payer policy (BC, AB, SK, ON, QC) and the  
28  
29 mandatory requirement to carry medication insurance (QC).  
30  
31  
32  
33  
34  
35  
36  
37  
38  
39  
40

41 *Clinical scenarios:*

42  
43 For individuals receiving social assistance, nearly all provinces provide comprehensive coverage  
44  
45 without cost-sharing. In the few provinces that require copayments, it is a nominal amount (ie.  
46  
47 \$2-5 per prescription). Thus, such individuals in both the low and high medication burden  
48  
49 scenarios, experience limited or no expenses for their prescription medications.  
50  
51  
52  
53  
54  
55  
56  
57  
58  
59  
60

1  
2  
3 In the low medication burden scenario, out-of-pocket costs vary across Canada, ranging from  
4 \$250 to \$2100 for those with higher incomes (Figure 1: a and b), and from \$0 to \$700 for lower  
5 income individuals (Figure 1: c and d). The out-of-pocket costs were generally lower for Seniors  
6 than for younger residents and for lower income individuals compared to those with higher  
7 incomes. There are several provincial outliers, particularly notable are the provinces that use  
8 premiums (AB [non-seniors], QC and NB [seniors]). Due to the premium costs in these  
9 provinces, individuals with low medication burdens were found to potentially contribute more  
10 than their actual medication costs (approx. \$500).  
11  
12  
13  
14  
15  
16  
17  
18  
19  
20  
21  
22  
23  
24  
25

26 In the high medication burden scenario, out-of-pocket costs ranged \$250 to \$2500 for higher  
27 income individuals (Figure 2: a and b), and from \$0 to \$1100 for lower income individuals  
28 (Figure 2: c and d). In all provinces, patient income level, or in some cases income-to-  
29 medication-burden ratio, is used to determine cost sharing. This feature of means-testing is less  
30 prominent in Alberta, meaning that Albertans, irrespective of income, pay nearly the same  
31 amount for their medications (there is a slight premium subsidy for those with incomes  
32 <\$20,970). Therefore, lower income Albertans experience among the highest out-of-pocket  
33 costs for seniors and the highest out-of-pocket costs for non-seniors.  
34  
35  
36  
37  
38  
39  
40  
41  
42  
43  
44  
45  
46  
47

## 48 Discussion

49  
50 All Canadian provinces have publicly-funded medication insurance plans that provide some level  
51 of support to all residents. However, each province and occasionally the different plans within a  
52 province, utilize a variety of cost-sharing mechanisms. A few provinces have premium-based  
53  
54  
55  
56  
57  
58  
59  
60

1  
2  
3 systems for certain segments of the population (non-seniors in AB, those with higher incomes in  
4  
5 NB & NS, those without private insurance in QC), while several have adopted models with  
6  
7 deductibles and others rely predominantly on copayments or co-insurance. Some provinces  
8  
9 provide more generous coverage to those over the age of 65 while others have across the board  
10  
11 means-testing, regardless of age.  
12  
13  
14  
15  
16  
17

18 This study is particularly relevant in the current climate with frequent discussion in the  
19  
20 academic literature regarding the need for a system of national pharmacare to replace the  
21  
22 current patchwork system of pharmaceutical insurance in Canada (9). However, as  
23  
24 demonstrated in the present work, there are no circumstances where public medication  
25  
26 insurance, in some form, is unavailable to an individual. Given that there is a publicly-funded  
27  
28 plan available for all Canadians, one could argue that Canadian provinces have achieved  
29  
30 universality in medication coverage. Despite this achievement, 1 in 10 Canadians experience  
31  
32 cost-related non-adherence (3). This suggests that the main gap in contemporary medication  
33  
34 coverage is not the ability to obtain medication insurance per se, but rather the affordability of  
35  
36 medications within insurance plans. Affordability may be addressed by policy changes targeting  
37  
38 cost-sharing structures, rather than focusing on national pharmacare, which would require  
39  
40 significant and expensive administrative restructuring. Recent work has demonstrated that  
41  
42 there is a threshold of out of pocket expenditures above which patients may be more likely to  
43  
44 perceive financial barriers. While the exact threshold remains unknown, it is likely between 3-  
45  
46 5 % of household income (6). Changes in cost-sharing that limit patients' out-of-pocket  
47  
48  
49  
50  
51  
52  
53  
54  
55  
56  
57  
58  
59  
60



1  
2  
3 exposure to less than 5% of household income may reduce the number of Canadians who are  
4  
5 forced to engage in cost related non-adherence.  
6  
7

8  
9  
10 While it is known that cost-sharing is associated with decreased adherence for individuals with  
11  
12 lower incomes (10), it remains unclear which form of cost-sharing has less impact on adherence  
13  
14 or is preferred by patients. The only data published on this topic comes from a recent US study  
15  
16 which demonstrated that while higher deductible *health* insurance plans often lead to higher  
17  
18 out-of-pocket expenses, they do not result in patients choosing to delay seeking care due to  
19  
20 costs (11); there are not data published that assess the relationship specifically for medication  
21  
22 insurance. Given the differences in medication insurance coverage across Canada, additional  
23  
24 research on the association between plan design, appropriate medication use, adherence and  
25  
26 outcomes could inform policy.  
27  
28  
29  
30  
31  
32  
33  
34  
35

36 Only a few provincial medication plans use premiums. A reliance on premiums may lead to  
37  
38 situations where it is advantageous for individuals to remain uninsured. These would be cases  
39  
40 when an individual's medication burden, even when paying 100% of the cost, remains less than  
41  
42 the cost of premiums and copayments. This insurance selectivity may lead to an unbalanced  
43  
44 risk pool in the insurance market and leave the publicly funded plans insuring only those at  
45  
46 highest risk (or with greatest expense). In order to address this issue, Quebec has instituted a  
47  
48 mandatory insurance policy although publications assessing the impact of this policy are lacking  
49  
50  
51  
52  
53 (12, 13). Further study assessing the implications of mandatory insurance for private insurance,  
54  
55  
56  
57  
58  
59  
60

1  
2  
3 public support for legislative changes, and the impact on out-of-pocket costs would be required  
4  
5 before other provinces consider adopting mandatory insurance.  
6  
7

8  
9 Another way to achieve lower out-of-pocket costs is to decrease the price of medications paid  
10  
11 by the provinces. Proposed ways to accomplish this include mandatory generic substitution  
12  
13 regulations, and active negotiations between united provincial payers and the pharmaceutical  
14  
15 industry (14). The Patented Medications Price Review Board was one mechanism put in place to  
16  
17 accomplish more effective negotiations, yet to date this has been largely unsuccessful in  
18  
19 reducing prices for a number of reasons (15). There is some optimism surrounding the more  
20  
21 recently formed Pan-Canadian Pharmaceutical Alliance with hopes that it will be more  
22  
23 successful in increasing the bargaining power of the individual Canadian provinces in order to  
24  
25 lower total medication costs resulting in savings to payers and ultimately to patients (through  
26  
27 lower copayments) (16).  
28  
29  
30  
31  
32  
33  
34  
35  
36

### 37 **Limitations**

38  
39 This study is limited by the complexity of each province's multitude of public medication  
40  
41 insurance plans. We gathered information from publicly available sources (ie. provincial  
42  
43 websites) to obtain accurate and up-to-date information on each medication plan, yet specifics  
44  
45 regarding how each province administers their plans was not uniformly available. While we tried  
46  
47 to be comprehensive with our clinical cases and age/demographic scenarios, it is difficult to  
48  
49 represent all possible combinations of the important contributing variables, especially given the  
50  
51 very high number of plans that are available in certain provinces. Of particular note, we only  
52  
53 considered the standard population based plans across the provinces. Many provinces also  
54  
55  
56  
57  
58  
59  
60

1  
2  
3 have a variety of specialized programs that support patients with exceptional needs such as  
4  
5 palliative care, high-cost medications, infectious diseases and cancer. There may be  
6  
7  
8 interprovincial variation in these plans but this was not the focus of this study.  
9  
10

### 11 12 13 **Conclusions** 14

15  
16 Canada's delivery of pharmaceutical insurance has been described as a patchwork, with each  
17  
18 province having separate medication insurance plans leading to some variations in out of pocket  
19  
20 payments across the provinces. Despite this variation, there is a publicly available plan for all  
21  
22 Canadians. Taken in concert with past studies that have shown that 10-12% of Canadians  
23  
24 experience financial barriers that result in cost-related non-adherence, the ability to obtain  
25  
26 medication insurance may not be the main issue, but rather the affordability of that insurance  
27  
28 based on the cost-sharing structures that are in place. Cost sharing that varies with income may  
29  
30 lead to more equitable access to medications. Medication plan reform targeted towards  
31  
32 supporting those that may be at highest risk of financial barriers may achieve the greatest  
33  
34  
35  
36  
37  
38  
39  
40  
41  
42  
43  
44  
45  
46  
47  
48  
49  
50  
51  
52  
53  
54  
55  
56  
57  
58  
59  
60  
61  
62  
63  
64  
65  
66  
67  
68  
69  
70  
71  
72  
73  
74  
75  
76  
77  
78  
79  
80  
81  
82  
83  
84  
85  
86  
87  
88  
89  
90  
91  
92  
93  
94  
95  
96  
97  
98  
99  
100  
101  
102  
103  
104  
105  
106  
107  
108  
109  
110  
111  
112  
113  
114  
115  
116  
117  
118  
119  
120  
121  
122  
123  
124  
125  
126  
127  
128  
129  
130  
131  
132  
133  
134  
135  
136  
137  
138  
139  
140  
141  
142  
143  
144  
145  
146  
147  
148  
149  
150  
151  
152  
153  
154  
155  
156  
157  
158  
159  
160  
161  
162  
163  
164  
165  
166  
167  
168  
169  
170  
171  
172  
173  
174  
175  
176  
177  
178  
179  
180  
181  
182  
183  
184  
185  
186  
187  
188  
189  
190  
191  
192  
193  
194  
195  
196  
197  
198  
199  
200  
201  
202  
203  
204  
205  
206  
207  
208  
209  
210  
211  
212  
213  
214  
215  
216  
217  
218  
219  
220  
221  
222  
223  
224  
225  
226  
227  
228  
229  
230  
231  
232  
233  
234  
235  
236  
237  
238  
239  
240  
241  
242  
243  
244  
245  
246  
247  
248  
249  
250  
251  
252  
253  
254  
255  
256  
257  
258  
259  
260  
261  
262  
263  
264  
265  
266  
267  
268  
269  
270  
271  
272  
273  
274  
275  
276  
277  
278  
279  
280  
281  
282  
283  
284  
285  
286  
287  
288  
289  
290  
291  
292  
293  
294  
295  
296  
297  
298  
299  
300  
301  
302  
303  
304  
305  
306  
307  
308  
309  
310  
311  
312  
313  
314  
315  
316  
317  
318  
319  
320  
321  
322  
323  
324  
325  
326  
327  
328  
329  
330  
331  
332  
333  
334  
335  
336  
337  
338  
339  
340  
341  
342  
343  
344  
345  
346  
347  
348  
349  
350  
351  
352  
353  
354  
355  
356  
357  
358  
359  
360  
361  
362  
363  
364  
365  
366  
367  
368  
369  
370  
371  
372  
373  
374  
375  
376  
377  
378  
379  
380  
381  
382  
383  
384  
385  
386  
387  
388  
389  
390  
391  
392  
393  
394  
395  
396  
397  
398  
399  
400  
401  
402  
403  
404  
405  
406  
407  
408  
409  
410  
411  
412  
413  
414  
415  
416  
417  
418  
419  
420  
421  
422  
423  
424  
425  
426  
427  
428  
429  
430  
431  
432  
433  
434  
435  
436  
437  
438  
439  
440  
441  
442  
443  
444  
445  
446  
447  
448  
449  
450  
451  
452  
453  
454  
455  
456  
457  
458  
459  
460  
461  
462  
463  
464  
465  
466  
467  
468  
469  
470  
471  
472  
473  
474  
475  
476  
477  
478  
479  
480  
481  
482  
483  
484  
485  
486  
487  
488  
489  
490  
491  
492  
493  
494  
495  
496  
497  
498  
499  
500  
501  
502  
503  
504  
505  
506  
507  
508  
509  
510  
511  
512  
513  
514  
515  
516  
517  
518  
519  
520  
521  
522  
523  
524  
525  
526  
527  
528  
529  
530  
531  
532  
533  
534  
535  
536  
537  
538  
539  
540  
541  
542  
543  
544  
545  
546  
547  
548  
549  
550  
551  
552  
553  
554  
555  
556  
557  
558  
559  
560  
561  
562  
563  
564  
565  
566  
567  
568  
569  
570  
571  
572  
573  
574  
575  
576  
577  
578  
579  
580  
581  
582  
583  
584  
585  
586  
587  
588  
589  
590  
591  
592  
593  
594  
595  
596  
597  
598  
599  
600  
601  
602  
603  
604  
605  
606  
607  
608  
609  
610  
611  
612  
613  
614  
615  
616  
617  
618  
619  
620  
621  
622  
623  
624  
625  
626  
627  
628  
629  
630  
631  
632  
633  
634  
635  
636  
637  
638  
639  
640  
641  
642  
643  
644  
645  
646  
647  
648  
649  
650  
651  
652  
653  
654  
655  
656  
657  
658  
659  
660  
661  
662  
663  
664  
665  
666  
667  
668  
669  
670  
671  
672  
673  
674  
675  
676  
677  
678  
679  
680  
681  
682  
683  
684  
685  
686  
687  
688  
689  
690  
691  
692  
693  
694  
695  
696  
697  
698  
699  
700  
701  
702  
703  
704  
705  
706  
707  
708  
709  
710  
711  
712  
713  
714  
715  
716  
717  
718  
719  
720  
721  
722  
723  
724  
725  
726  
727  
728  
729  
730  
731  
732  
733  
734  
735  
736  
737  
738  
739  
740  
741  
742  
743  
744  
745  
746  
747  
748  
749  
750  
751  
752  
753  
754  
755  
756  
757  
758  
759  
760  
761  
762  
763  
764  
765  
766  
767  
768  
769  
770  
771  
772  
773  
774  
775  
776  
777  
778  
779  
780  
781  
782  
783  
784  
785  
786  
787  
788  
789  
790  
791  
792  
793  
794  
795  
796  
797  
798  
799  
800  
801  
802  
803  
804  
805  
806  
807  
808  
809  
810  
811  
812  
813  
814  
815  
816  
817  
818  
819  
820  
821  
822  
823  
824  
825  
826  
827  
828  
829  
830  
831  
832  
833  
834  
835  
836  
837  
838  
839  
840  
841  
842  
843  
844  
845  
846  
847  
848  
849  
850  
851  
852  
853  
854  
855  
856  
857  
858  
859  
860  
861  
862  
863  
864  
865  
866  
867  
868  
869  
870  
871  
872  
873  
874  
875  
876  
877  
878  
879  
880  
881  
882  
883  
884  
885  
886  
887  
888  
889  
890  
891  
892  
893  
894  
895  
896  
897  
898  
899  
900  
901  
902  
903  
904  
905  
906  
907  
908  
909  
910  
911  
912  
913  
914  
915  
916  
917  
918  
919  
920  
921  
922  
923  
924  
925  
926  
927  
928  
929  
930  
931  
932  
933  
934  
935  
936  
937  
938  
939  
940  
941  
942  
943  
944  
945  
946  
947  
948  
949  
950  
951  
952  
953  
954  
955  
956  
957  
958  
959  
960  
961  
962  
963  
964  
965  
966  
967  
968  
969  
970  
971  
972  
973  
974  
975  
976  
977  
978  
979  
980  
981  
982  
983  
984  
985  
986  
987  
988  
989  
990  
991  
992  
993  
994  
995  
996  
997  
998  
999  
1000

## References

1. Barnieh L, Clement F, Harris A, Blom M, Donaldson C, Klarenbach S, et al. A systematic review of cost-sharing strategies used within publicly-funded drug plans in member countries of the Organisation for Economic Co-Operation and Development. *PloS one*. 2014;9(3):e90434.
2. Campbell DJ, King-Shier K, Hemmelgarn BR, Sanmartin C, Ronksley PE, Weaver RG, et al. Self-reported financial barriers to care among patients with cardiovascular-related chronic conditions. *Health Rep*. 2014;25(5):3-12.
3. Law MR, Cheng L, Dhalla IA, Heard D, Morgan SG. The effect of cost on adherence to prescription medications in Canada. *CMAJ*. 2012;184(3):297-302.
4. Campbell DJ, Manns BJ, Weaver RG, Hemmelgarn BR, King-Shier KM, Sanmartin C. Financial barriers and adverse clinical outcomes among patients with cardiovascular-related chronic diseases: a cohort study. *BMC medicine*. 2017;15(1):33.
5. Daw JR, Morgan SG. Stitching the gaps in the Canadian public drug coverage patchwork?: a review of provincial pharmacare policy changes from 2000 to 2010. *Health Policy*. 2012;104(1):19-26.
6. Hennessy D, Sanmartin C, Ronksley PE, Weaver RG, Campbell DJ, Manns B, et al. Out-of-pocket spending on drugs and pharmaceutical products and cost-related non-adherence among Canadians with chronic disease. *Health Reports*. 2016;27(6):3-8.
7. Demers V, Melo M, Jackevicius C, Cox J, Kalavrouziotis D, Rinfret S, et al. Comparison of provincial prescription drug plans and the impact on patients' annual drug expenditures. *CMAJ*. 2008;178(4):405-9.
8. Alberta Health. Interactive Drug Benefit List 2017 [Available from: [https://www.ab.bluecross.ca/dbl/idbl\\_main1.html](https://www.ab.bluecross.ca/dbl/idbl_main1.html)].
9. Morgan SG, Li W, Yau B, Persaud N. Estimated effects of adding universal public coverage of an essential medicines list to existing public drug plans in Canada. *CMAJ*. 2017;189(8):E295-E302.
10. Choudhry NK, Avorn J, Glynn RJ, Antman EM, Schneeweiss S, Toscano M, et al. Full coverage for preventive medications after myocardial infarction. *N Engl J Med*. 2011;365(22):2088-97.
11. Segal J, Kullgren J. Health Insurance Deductibles and Their Associations With Out-of-Pocket Spending and Affordability Barriers Among US Adults With Chronic Conditions. *JAMA Internal Medicine*. 2017;177(3):433-6.
12. Pomey MP, Forest PG, Palley HA, Martin E. Public/private partnerships for prescription drug coverage: Policy formulation and outcomes in Quebec's universal drug insurance program, with comparisons to the Medicare prescription drug program in the United States. *Milbank Quarterly*. 2007;85(3):469-98.
13. Wang C, Li Q, Sweetman A, Hurley J. Mandatory universal drug plan, access to health care and health: Evidence from Canada. *Journal of Health Economics*. 2015;44:80-96.
14. Tang KL, Ghali WA, Manns BJ. Addressing cost-related barriers to prescription drug use in Canada. *CMAJ*. 2014;186(4):276-80.
15. Zhang R, Martin D, Naylor CD. Regulator or regulatory shield? The case for reforming Canada's Patented Medicine Prices Review Board. *CMAJ*. 2017;189(14):E515-E6.

1  
2  
3  
4  
5  
6  
7  
8  
9  
10  
11  
12  
13  
14  
15  
16  
17  
18  
19  
20  
21  
22  
23  
24  
25  
26  
27  
28  
29  
30  
31  
32  
33  
34  
35  
36  
37  
38  
39  
40  
41  
42  
43  
44  
45  
46  
47  
48  
49  
50  
51  
52  
53  
54  
55  
56  
57  
58  
59  
60

16. O'Quinn S, Mani A. pan-Canadian Pharmaceutical Alliance: Context, Best Practices, Trends and Outlook. Ottawa, ON: PDCI Market Access; 2016.

Confidential

1  
2  
3  
4  
5  
6  
7  
8  
9  
10  
11  
12  
13  
14  
15  
16  
17  
18  
19  
20  
21  
22  
23  
24  
25  
26  
27  
28  
29  
30  
31  
32  
33  
34  
35  
36  
37  
38  
39  
40  
41  
42  
43  
44  
45  
46  
47  
48  
49  
50  
51  
52  
53  
54  
55  
56  
57  
58  
59  
60

Figure legend

Figure 1: Out-of-pocket expenditures by province, Low medication burden scenario

Figure 2: Out-of-pocket expenditures by province, High medication burden scenario

Confidential

## Box 1: Overview of the clinical scenarios and patient demographic profiles considered

| <b>Clinical Scenarios</b>                                                                                                                                                                                                                                                                                                                                                                                                                                                                                                                                                                                                                                                                                                                                                                                            |
|----------------------------------------------------------------------------------------------------------------------------------------------------------------------------------------------------------------------------------------------------------------------------------------------------------------------------------------------------------------------------------------------------------------------------------------------------------------------------------------------------------------------------------------------------------------------------------------------------------------------------------------------------------------------------------------------------------------------------------------------------------------------------------------------------------------------|
| <ol style="list-style-type: none"> <li data-bbox="233 327 1365 590">1. Case 1: hypothyroidism, osteoporosis, depression and anxiety currently taking levothyroxine (75 mcg daily), alendronate sodium (70 mg weekly), lorazepam (1 mg nightly) and escitalopram (20 mg daily). Approximate medication cost: \$500 (Low cost)</li> <li data-bbox="233 636 1365 978">2. Case 2: type 2 diabetes mellitus and coronary artery disease currently taking atorvastatin (40 mg daily), carvedilol (12.5 mg twice daily), irbesartan (150 mg daily), clopidogrel (75 mg daily), nitroglycerin (0.4 mg/hr transdermally 12hrs daily), metformin (1000mg twice daily), and insulin glargine (50 units subcutaneously twice daily). Approximate medication cost: \$1800 (High cost)</li> </ol>                                  |
| <b>Patient Demographic Profiles</b>                                                                                                                                                                                                                                                                                                                                                                                                                                                                                                                                                                                                                                                                                                                                                                                  |
| <ol style="list-style-type: none"> <li data-bbox="233 1104 1268 1209">1. Social assistance beneficiary: a 35 year old who is receiving social assistance benefits.</li> <li data-bbox="233 1255 1341 1444">2. Low income Senior: a 67 year old with an annual after-tax income of \$14,000 who receives the Old Age Supplement (OAS) and the Guaranteed Income Supplement (GIS).</li> <li data-bbox="233 1491 1284 1596">3. High income Senior: a 72 year old with an annual after-tax income of \$55,000 including CPP and private pensions.</li> <li data-bbox="233 1642 1357 1673">4. Low income Non-Senior: a 52 year old with an annual after-tax income of \$14,000.</li> <li data-bbox="233 1719 1365 1751">5. High income Non- Senior: a 45 year old with an annual after-tax income of \$55,000.</li> </ol> |

**Table 1. Overview of Characteristics of Publicly Funded Medication Plans across Canadian Provinces/Territories**

| Province and Territory    | Number of Plans | Common target populations for publicly funded medication plans (✓) and whether coverage is subject to a premium |                            |                              | Generic Payment Rules | Government First Payer |
|---------------------------|-----------------|-----------------------------------------------------------------------------------------------------------------|----------------------------|------------------------------|-----------------------|------------------------|
|                           |                 | General Population                                                                                              | Seniors <sup>1</sup>       | Social Assistance/Low Income |                       |                        |
| Alberta                   | 10              | Premiums                                                                                                        | ✓                          | ✓                            | ✓                     | ✓                      |
| British Columbia          | 10              | ✓                                                                                                               | Born before 1939           | ✓                            | ✓                     | ✓                      |
| Saskatchewan              | 11              | ✓                                                                                                               | ✓                          | ✓                            | ✓                     | ✓                      |
| Manitoba                  | 5               | ✓                                                                                                               | Same as general population | ✓                            | ✓                     | ✗                      |
| Ontario                   | 7               | ✓                                                                                                               | ✓                          | ✓                            | ✓                     | ✓                      |
| Quebec <sup>2</sup>       | 1               | Premiums                                                                                                        | Premiums                   | ✓                            | ✓                     | ✓                      |
| Newfoundland and Labrador | 5               | ✓                                                                                                               | ✓                          | ✓                            | ✓                     | ✗                      |
| Nova Scotia               | 5               | ✓                                                                                                               | Premiums                   | ✓                            | ✓                     | ✗                      |
| New Brunswick             | 10              | Premiums                                                                                                        | Low income only            | ✓                            | ✓                     | ✗                      |
| Prince Edward Island      | 27              | Combination of plans <sup>3</sup>                                                                               | ✓                          | ✓                            | ✓                     | ?                      |

✓ = yes; ✗ = no; ? = unclear



1  
2  
3  
4  
5  
6  
7  
8  
9  
10  
11  
12  
13  
14  
15  
16  
17  
18  
19  
20  
21  
22  
23  
24  
25  
26  
27  
28  
29  
30  
31  
32  
33  
34  
35  
36  
37  
38  
39  
40  
41  
42  
43  
44  
45  
46  
47  
48  
49  
50  
51  
52  
53  
54  
55  
56  
57  
58  
59  
60

<sup>1</sup> Over 65 years of age unless otherwise denoted.

<sup>2</sup> All persons are mandated to have insurance (private or public).

<sup>3</sup> Prince Edward Island has a variety of disease- and medication-based plans for those under 65 years of age.

Confidential

1  
2  
3  
4  
5  
6  
7  
8  
9  
10  
11  
12  
13  
14  
15  
16  
17  
18  
19  
20  
21  
22  
23  
24  
25  
26  
27  
28  
29  
30  
31  
32  
33  
34  
35  
36  
37  
38  
39  
40  
41  
42  
43  
44  
45  
46  
47  
48  
49  
50  
51  
52  
53  
54  
55  
56  
57  
58  
59  
60

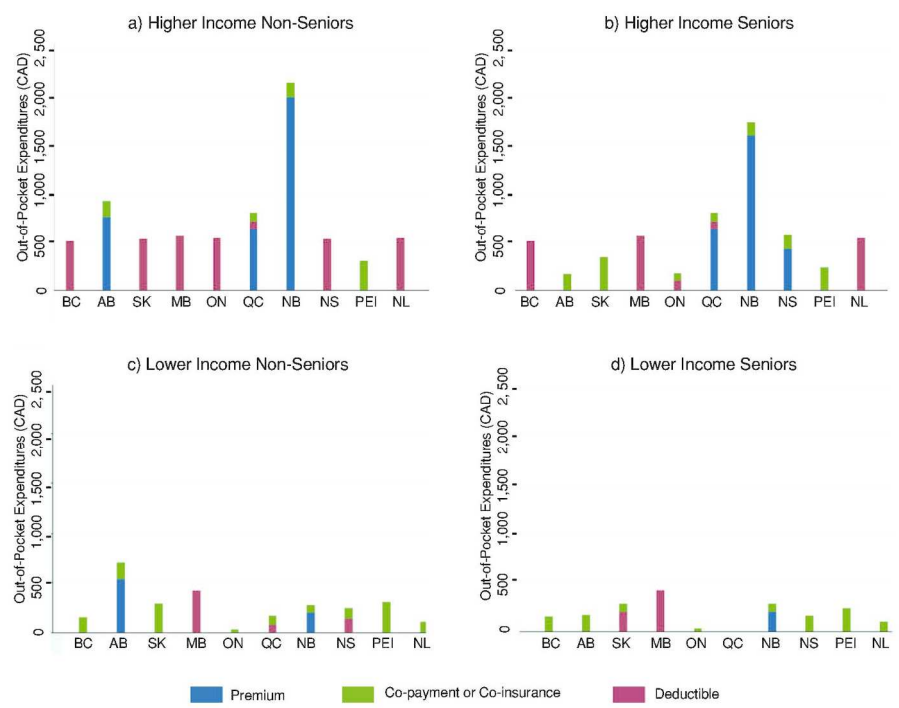

Figure 1: Out-of-pocket expenditures by province, Low medication burden scenario  
215x279mm (220 x 220 DPI)

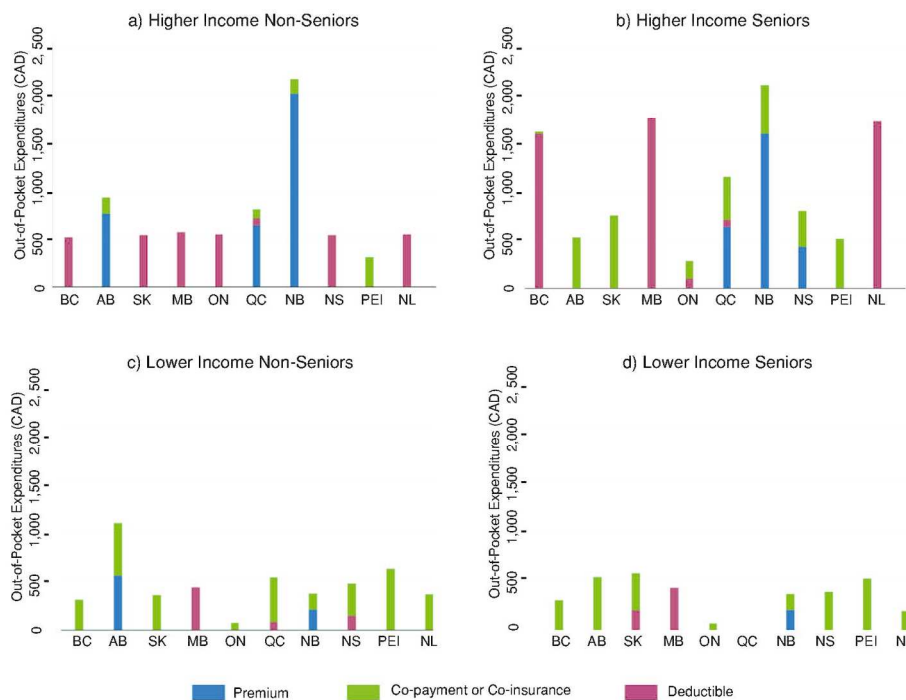

Figure 2: Out-of-pocket expenditures by province, High medication burden scenario

215x279mm (218 x 213 DPI)

1  
2  
3  
4  
5  
6  
7  
8  
9  
10  
11  
12  
13  
14  
15  
16  
17  
18  
19  
20  
21  
22  
23  
24  
25  
26  
27  
28  
29  
30  
31  
32  
33  
34  
35  
36  
37  
38  
39  
40  
41  
42  
43  
44  
45  
46  
47  
48  
49

**Web Appendix:**

**Table 1. Characteristics of Publicly Funded Medication Plans for those on Social Assistance/Low Income**

|                         | <b>Name of Plan</b>                                                                           | <b>Premium</b> | <b>Fixed Copayment</b>                          | <b>Co-Insurance</b> | <b>Deductible</b> | <b>Maximum Out-of-Pocket</b> |
|-------------------------|-----------------------------------------------------------------------------------------------|----------------|-------------------------------------------------|---------------------|-------------------|------------------------------|
| <b>Alberta</b>          | Alberta Adult Health Benefit (AAHB)                                                           | x              | x                                               | x                   | x                 | N/A                          |
| <b>British Columbia</b> | PharmaCare Plan C                                                                             | x              | x                                               | x                   | x                 | N/A                          |
| <b>Saskatchewan</b>     | Supplementary Health Program – Prescription Medications                                       | x              | Up to \$2 per prescription dispensed for adults | x                   | x                 | x                            |
| <b>Manitoba</b>         | Employment and Income Assistance (EIA) – Prescription Medications Assistance for Participants | x              | x                                               | x                   | x                 | N/A                          |
| <b>Ontario</b>          | Ontario Medication Benefit (ODB) Program                                                      | x              | \$2 per prescription dispensed                  | x                   | x                 | x                            |
| <b>Quebec</b>           | Public Prescription Medication Insurance Plan                                                 | x              | x                                               | x                   | x                 | x                            |

|                                  | Name of Plan                                                                               | Premium | Fixed Copayment                                                                        | Co-Insurance                                              | Deductible | Maximum Out-of-Pocket          |
|----------------------------------|--------------------------------------------------------------------------------------------|---------|----------------------------------------------------------------------------------------|-----------------------------------------------------------|------------|--------------------------------|
| <b>Newfoundland and Labrador</b> | Foundation Plan (income support recipients)                                                | ✘       | ✘                                                                                      | ✘                                                         | ✘          | N/A                            |
|                                  | Access Plan (low income families and individuals)                                          | ✘       | ✘                                                                                      | 20% - 70% of total prescription costs, varies with income | ✘          | ✘                              |
| <b>Nova Scotia</b>               | Pharmacare Benefit                                                                         | ✘       | \$5 per prescription dispensed                                                         | ✘                                                         | ✘          | ✘                              |
| <b>New Brunswick</b>             | Plan E (Adults in Licensed Residential Facilities)                                         | ?       | \$4 per prescription dispensed                                                         | ✘                                                         | ?          | \$250 annually                 |
|                                  | Plan F (Social Development Clients)                                                        | ?       | \$4 per prescription dispensed for adults (> 18 yrs.) and \$2 for children (< 18 yrs.) | ✘                                                         | ?          | \$250 per family unit annually |
|                                  | Plan G (Special needs children and children in care of the Minister of Social Development) | ✘       | ✘                                                                                      | ✘                                                         | ✘          | N/A                            |
| <b>Prince Edward Island</b>      | Financial Assistance Medication Program                                                    | ✘       | ✘                                                                                      | ✘                                                         | ✘          | N/A                            |

✘ = no; N/A = not applicable; -- = not covered; ? = unclear

1  
2  
3  
4  
5  
6  
7  
8  
9  
10  
11  
12  
13  
14  
15  
16  
17  
18  
19  
20  
21  
22  
23  
24  
25  
26  
27  
28  
29  
30  
31  
32  
33  
34  
35  
36  
37  
38  
39  
40  
41  
42  
43  
44  
45  
46  
47  
48  
49

**Table 2. Characteristics of Publicly Funded Medication Plans for Seniors**

|                                               | <b>Name of Plan</b>                           | <b>Premium</b> | <b>Fixed Copayment</b>                                       | <b>Co-Insurance</b>                                             | <b>Deductible</b>                                                                                        | <b>Maximum Out-of-Pocket</b>                       |
|-----------------------------------------------|-----------------------------------------------|----------------|--------------------------------------------------------------|-----------------------------------------------------------------|----------------------------------------------------------------------------------------------------------|----------------------------------------------------|
| <b>Alberta</b><br>(Over age of 65)            | Coverage for Seniors                          | ✘              | ✘                                                            | 30% of the cost of the prescription dispensed.                  | ✘                                                                                                        | \$25 maximum per prescription dispensed            |
| <b>British Columbia</b><br>(Born before 1939) | Fair Pharmacare                               | ✘              | ✘                                                            | After deductible, 25% of the cost of the prescription dispensed | Annually 0-2% of net income, varies with income                                                          | Annually 1.25-3% of net income, varies with income |
| <b>Saskatchewan</b><br>(Over age of 65)       | Seniors' Medication Plan                      | ✘              | Maximum \$20 per prescription medication dispensed           | ✘                                                               | ✘<br><br>(Unless GIS recipient, Seniors Income Plan [SIP], or supplemented with Special Support Program) | N/A                                                |
| <b>Manitoba</b>                               | Same as general population. No age-based plan |                |                                                              |                                                                 |                                                                                                          |                                                    |
| <b>Ontario</b><br>(Over age of 65)            | Ontario Medication Benefit (ODB) Program      | ✘              | \$2 per prescription dispensed if income <\$16,018 (single), | ✘                                                               | \$0 if income <\$16,018 (single), <\$24,175 (couple)                                                     | N/A                                                |

|                                                                                                                                   | Name of Plan                                  | Premium                                  | Fixed Copayment                                                               | Co-Insurance                                                    | Deductible      | Maximum Out-of-Pocket                                             |
|-----------------------------------------------------------------------------------------------------------------------------------|-----------------------------------------------|------------------------------------------|-------------------------------------------------------------------------------|-----------------------------------------------------------------|-----------------|-------------------------------------------------------------------|
|                                                                                                                                   |                                               |                                          | <\$24,175 (couple)<br><br>Maximum \$6.11 per prescription dispensed otherwise |                                                                 | \$100 otherwise |                                                                   |
| <b>Quebec</b><br><br>(Over age of 65, not eligible for private insurance)                                                         | Public Prescription Medication Insurance Plan | Annually \$0 - \$607, varies with income | ✘                                                                             | After deductible, 34% of the cost of the prescription dispensed | \$18 monthly    | Monthly: \$85.75<br><br>Annual: \$1029                            |
| <b>Newfoundland and Labrador</b><br><br>(Over age of 65 and receiving Old Age Security Benefits and Guaranteed Income Supplement) | 65Plus Plan                                   | ✘                                        | Maximum \$6 of dispensing fee per prescription                                | ✘                                                               | ✘               | ✘                                                                 |
| <b>Nova Scotia</b><br><br>(Over age of 65)                                                                                        | Senior's Pharmacare                           | Annually \$0-\$424, varies with income   | ✘                                                                             | 30% of the cost of the prescription dispensed                   | ✘               | Annual limit including premium and copayments \$382-\$806, varies |

1  
2  
3  
4  
5  
6  
7  
8  
9  
10  
11  
12  
13  
14  
15  
16  
17  
18  
19  
20  
21  
22  
23  
24  
25  
26  
27  
28  
29  
30  
31  
32  
33  
34  
35  
36  
37  
38  
39  
40  
41  
42  
43  
44  
45  
46  
47  
48  
49

|                                                 | Name of Plan                                                                                                   | Premium       | Fixed Copayment                                                                                               | Co-Insurance | Deductible | Maximum Out-of-Pocket                                        |
|-------------------------------------------------|----------------------------------------------------------------------------------------------------------------|---------------|---------------------------------------------------------------------------------------------------------------|--------------|------------|--------------------------------------------------------------|
|                                                 |                                                                                                                |               |                                                                                                               |              |            | with income                                                  |
| <b>New Brunswick</b>                            | New Brunswick Seniors Plan A (Over 65 yrs. and receiving Guaranteed Income Supplement (GIS) or are low income) | ✘             | GIS recipients:<br>Maximum \$9.05 per prescription dispensed<br><br>\$15 per prescription dispensed otherwise | ✘            | ✘          | Annual for GIS recipients: \$500<br><br>No maximum otherwise |
|                                                 | Medavie Blue Cross Seniors Prescription Medication Program (over 65 yrs. of age)                               | \$115 monthly | Up to \$15 per prescription dispensed                                                                         | ✘            | ✘          | ✘                                                            |
| <b>Prince Edward Island</b><br>(Over age of 65) | Seniors' Medication Cost Assistance Program                                                                    | ✘             | Maximum \$8.25 per prescription dispensed plus pharmacy professional fee up to \$7.69                         | ✘            | ✘          | ✘                                                            |

✘ = no; N/A = not applicable; -- = not covered; ? = unclear



1  
2  
3  
4  
5  
6  
7  
8  
9  
10  
11  
12  
13  
14  
15  
16  
17  
18  
19  
20  
21  
22  
23  
24  
25  
26  
27  
28  
29  
30  
31  
32  
33  
34  
35  
36  
37  
38  
39  
40  
41  
42  
43  
44  
45  
46  
47  
48  
49

**Table 3. Characteristics of Publicly Funded Medication Plans for the General Population Under Age 65**

|                                                       | <b>Name of Plan</b>     | <b>Premium</b>                                                                         | <b>Fixed Copayment</b> | <b>Co-Insurance</b>                                                                                       | <b>Deductible</b>                                                            | <b>Maximum Out-of-Pocket</b>                           |
|-------------------------------------------------------|-------------------------|----------------------------------------------------------------------------------------|------------------------|-----------------------------------------------------------------------------------------------------------|------------------------------------------------------------------------------|--------------------------------------------------------|
| <b>Alberta</b><br>(AB resident, under 65 yrs. of age) | Non-Group Coverage      | Monthly premium<br><br>Single = \$63.50<br><br>Family = \$ 118<br><br>Billed quarterly | ✘                      | 30% of the cost of the prescription dispensed                                                             | ✘<br><br>(deductible applies to other health benefits, excludes medications) | \$25 maximum per prescription dispensed                |
| <b>British Columbia</b><br>(BC resident)              | Fair Pharmacare         | ✘                                                                                      | ✘                      | After deductible, 30% of the cost of the prescription dispensed                                           | Annually 0-3% of net family income, varies with income                       | Annually 2-4% of net family income, varies with income |
| <b>Saskatchewan</b><br>(Sask. resident)               | Special Support Program | ✘                                                                                      | ✘                      | Before deductible, varies with income and monthly medication expenditures<br><br>After deductible, 35% of | 3.4% of net family income<br><br>Paid semi-annually                          | ✘                                                      |

1  
2  
3  
4  
5  
6  
7  
8  
9  
10  
11  
12  
13  
14  
15  
16  
17  
18  
19  
20  
21  
22  
23  
24  
25  
26  
27  
28  
29  
30  
31  
32  
33  
34  
35  
36  
37  
38  
39  
40  
41  
42  
43  
44  
45  
46  
47  
48  
49

|                                                                                       | Name of Plan                                  | Premium                                        | Fixed Copayment                                          | Co-Insurance                                                          | Deductible                                                            | Maximum Out-of-Pocket                            |
|---------------------------------------------------------------------------------------|-----------------------------------------------|------------------------------------------------|----------------------------------------------------------|-----------------------------------------------------------------------|-----------------------------------------------------------------------|--------------------------------------------------|
|                                                                                       |                                               |                                                |                                                          | prescription dispensed                                                |                                                                       |                                                  |
| <b>Manitoba</b><br>(MB resident)                                                      | Pharmacare Program                            | ✘                                              | ✘                                                        | ✘                                                                     | Annually 2.97-6.73% of net income, varies by income, minimum of \$100 | N/A                                              |
| <b>Ontario</b><br>(ON resident, no or limited private insurance)                      | Trillium Medication Program                   | ✘                                              | After deductible, maximum \$2 per prescription dispensed | ✘                                                                     | Annually ~4% of net income<br><br>Paid quarterly.                     | ✘                                                |
| <b>Quebec</b><br>(those not eligible for private insurance)                           | Public Prescription Medication Insurance Plan | Annual premium \$0 - \$660, varies with income | ✘                                                        | After deductible, 34% of the cost of the prescription dispensed       | \$18 monthly                                                          | Monthly: \$85.75<br>Annual: \$1029               |
| <b>Newfoundland and Labrador</b><br>(NFLD resident, experience high medication costs) | Assurance Plan                                | ✘                                              | ✘                                                        | Rate= (family income*cap rate)/total medication expenditure of family | ✘                                                                     | Annually 5-10% of net income, varies with income |
| <b>Nova Scotia</b>                                                                    | Family                                        | ✘                                              | ✘                                                        | 20% of the cost of the                                                | Annually 1-20% of net                                                 | Annually 6-35% of net                            |

|                                                                        | <b>Name of Plan</b>                                                                                                                                                | <b>Premium</b>                                   | <b>Fixed Copayment</b> | <b>Co-Insurance</b>                                                                     | <b>Deductible</b>        | <b>Maximum Out-of-Pocket</b> |
|------------------------------------------------------------------------|--------------------------------------------------------------------------------------------------------------------------------------------------------------------|--------------------------------------------------|------------------------|-----------------------------------------------------------------------------------------|--------------------------|------------------------------|
| (NS resident)                                                          | Pharmacare                                                                                                                                                         |                                                  |                        | prescription dispensed                                                                  | income, varies by income | income, varies by income     |
| <b>New Brunswick</b><br>(NB resident, no or limited private insurance) | New Brunswick Medication Plan                                                                                                                                      | Annual premium \$200-\$2,000, varies with income | ✘                      | 30% of the cost to a maximum of \$5-\$30 per prescription dispensed, varies with income | ✘                        | ✘                            |
| <b>Prince Edward Island</b><br>(PEI residents, no private insurance)   | Generic Medication Program, 8 disease-based medication plans, 4 medication-specific plans and 2 high-cost medication plans. Limited details of coverage available. |                                                  |                        |                                                                                         |                          |                              |

✘ = no; N/A = not applicable; -- = not covered; ? = unclear
